# Supplementary material for: A biomimetic nanoplatform for customized photothermal therapy of HNSCC evaluated on patient-derived xenograft models
Source: Springer Nature journal article supplement (doi:10.1038/s41368-022-00211-2), 2023-02-10
Supplement: MOESM2 [file 41368_2022_211_MOESM2_ESM.pdf]

## Customized PTT

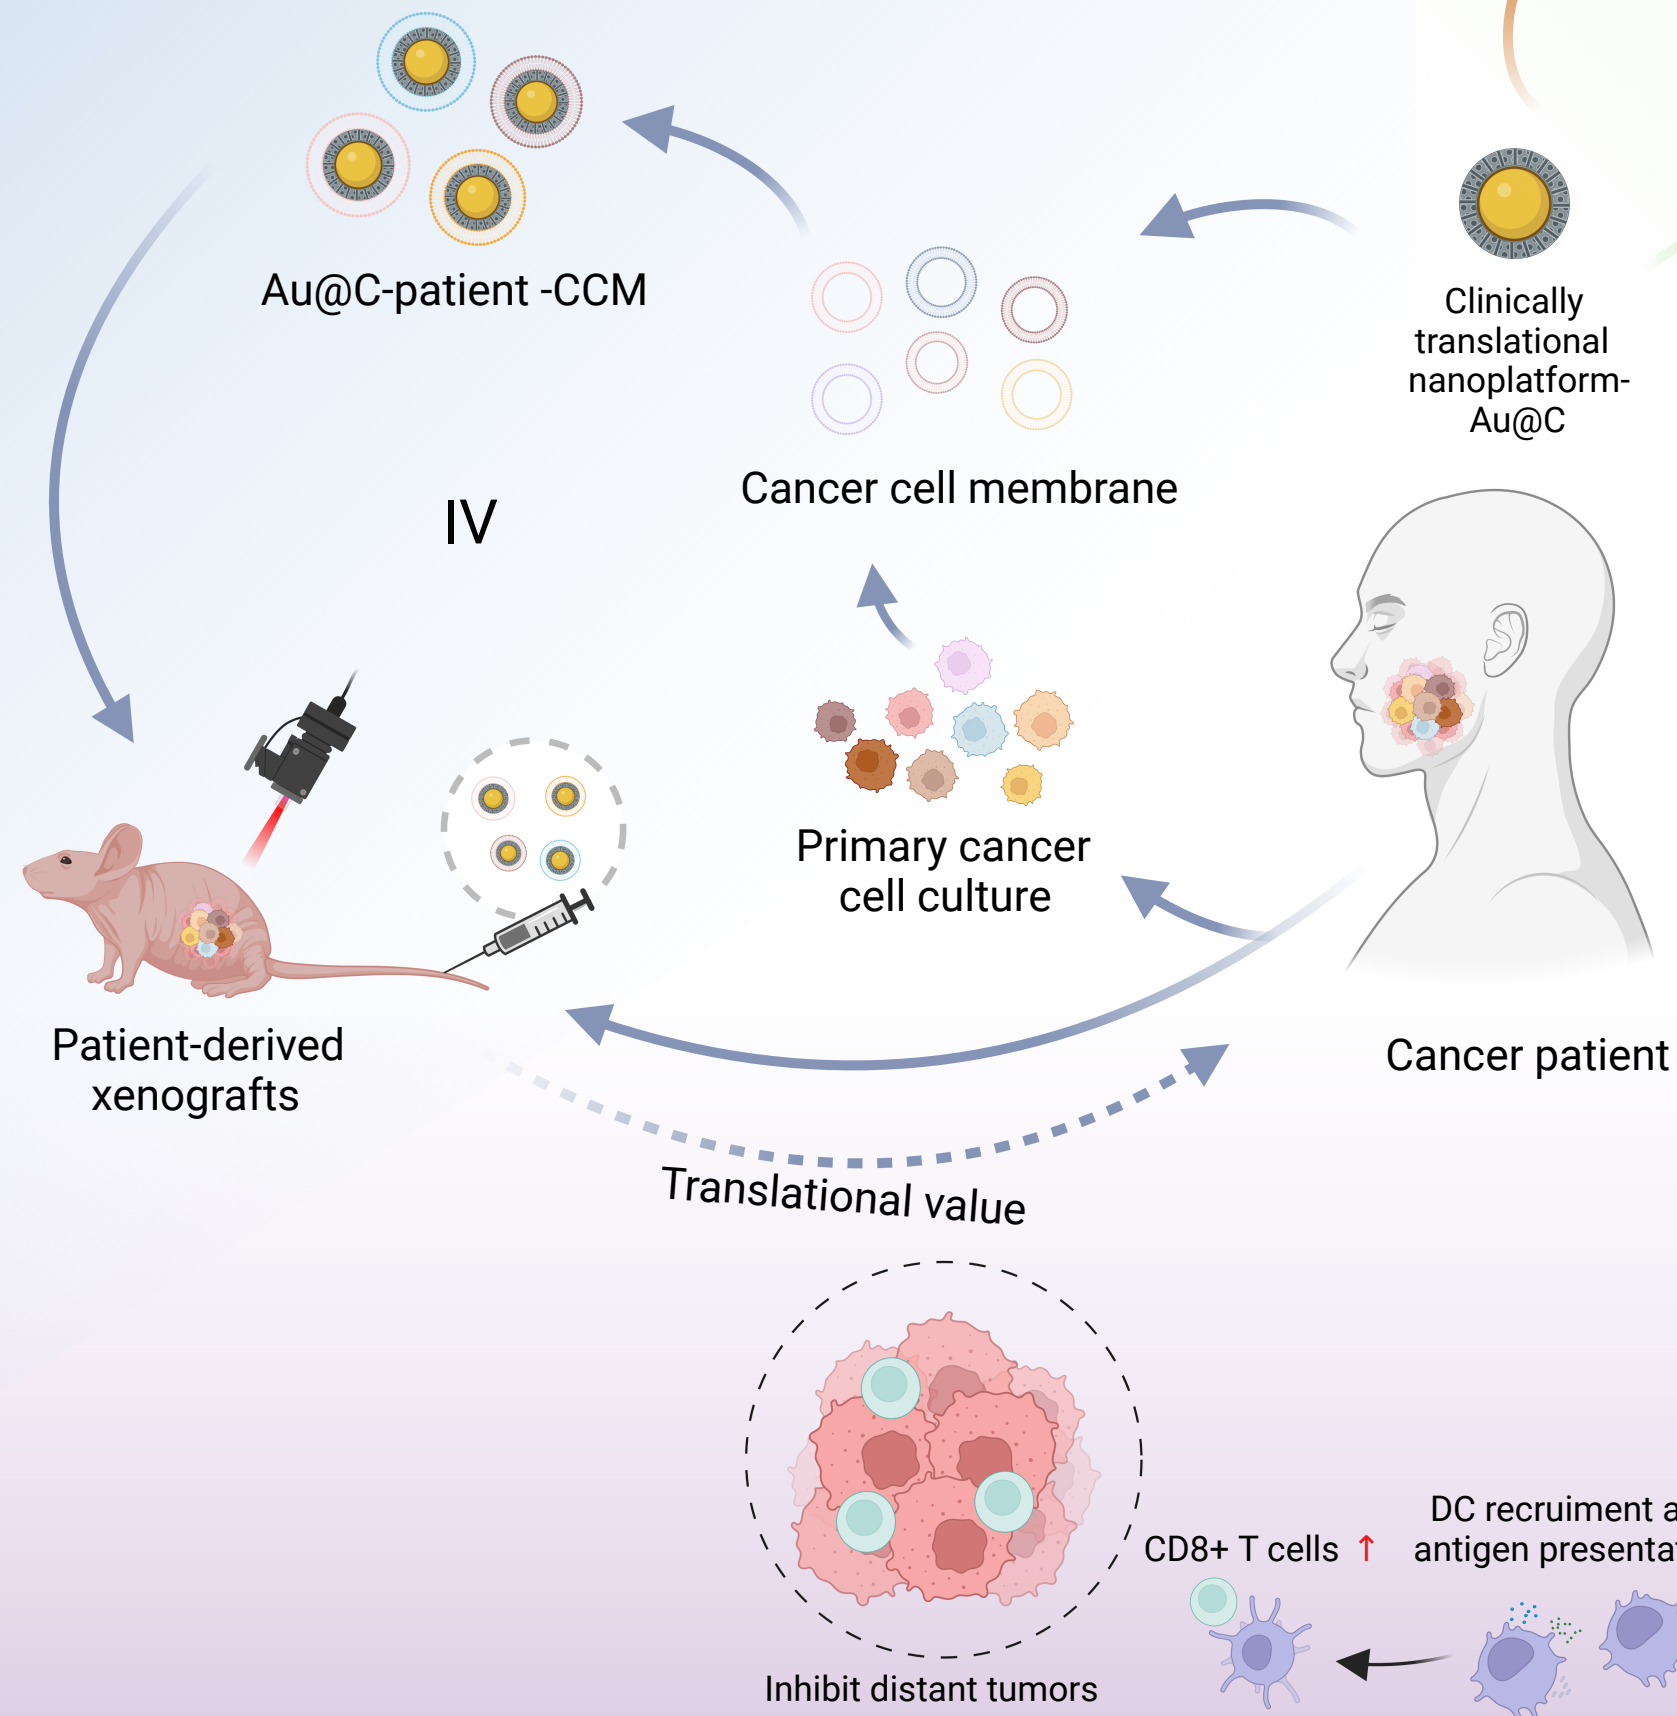

I CAL27-CCM cloaked Au@C in CDX models

III SCC7-CCM cloaked Au@C in immune-competent primary and distant tumor models

## Modular design

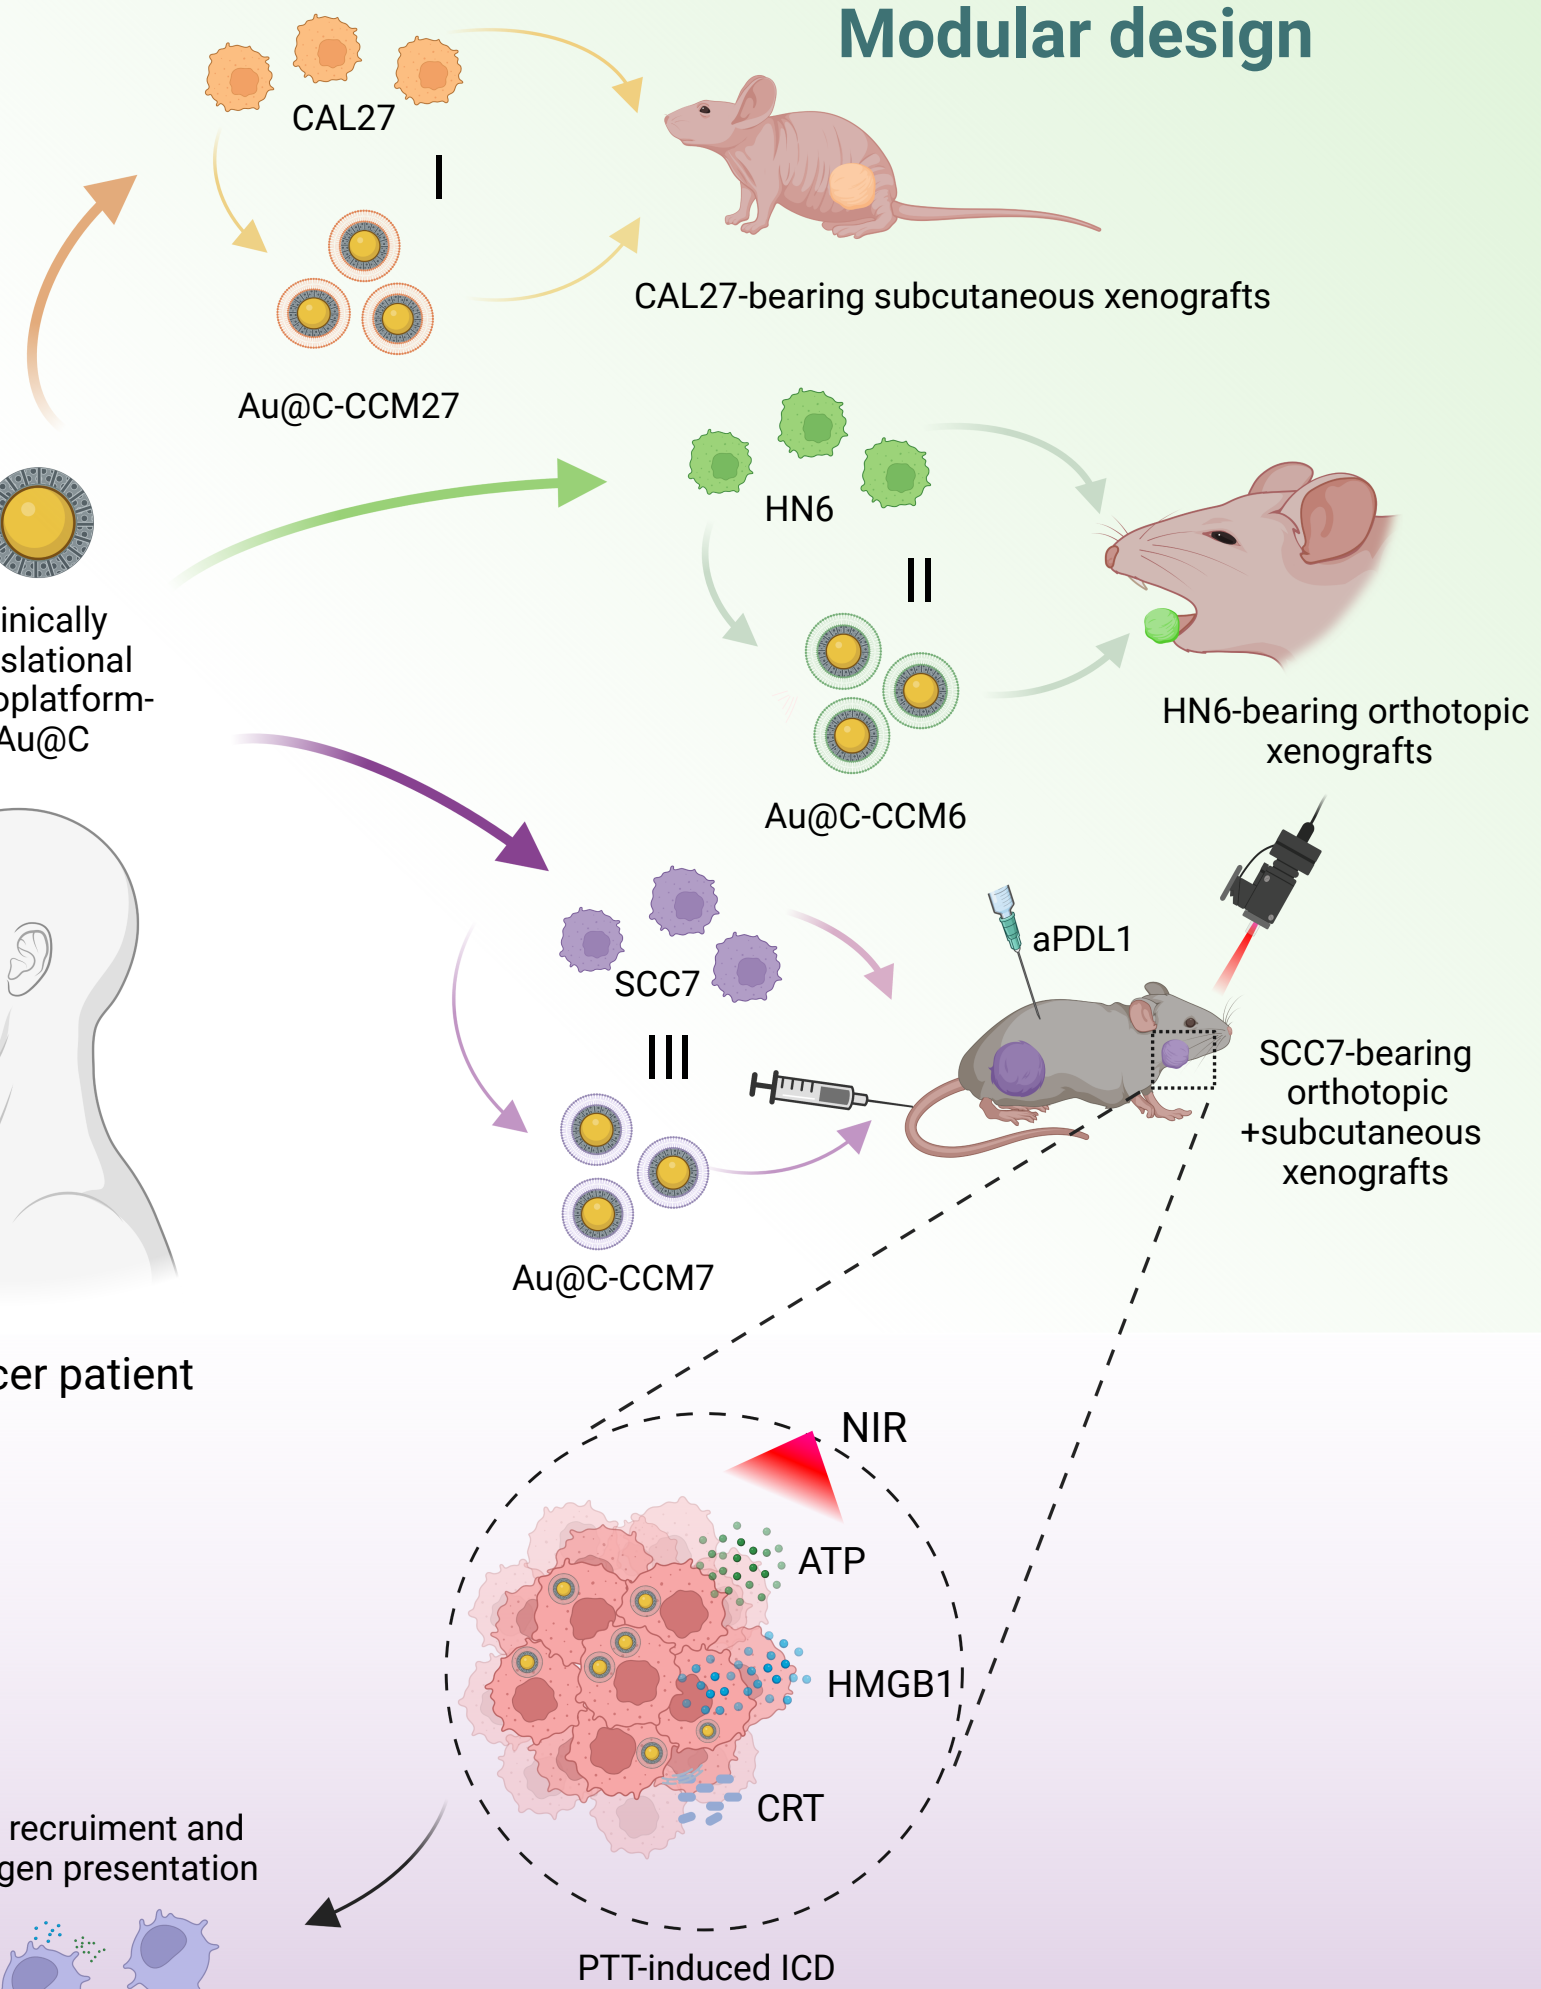

II HN6-CCM cloaked Au@C in TOX models

IV Customized PTT in PDX models

**Scheme 1** Schematic illustration of the modular design of the therapeutic processes for customized PTT based on tailored Au@C-CCM NPs.

Schematics were created with BioRender.com
